# Supplementary material
Source: PubMed Central journal article supplement (PMC2529023)
Supplement: 0805862105_0805862105SI.pdf [file 0805862105_0805862105SI.pdf]

# Supporting Information

Schuksz *et al.* 10.1073/pnas.0805862105

## SI Text

**Growth Curves.** CHO cells were grown in monolayer, lifted with 5 mM EDTA, counted with trypan blue, and seeded into 96-well plates at a density of 1,500 cells/well. Cells were allowed to adhere before the media was changed to contain 1.25  $\mu$ M to 20  $\mu$ M surfen. At 1, 2, and 3 d after surfen addition, 20  $\mu$ l CellTiter Blue (Promega) was added and incubated on cells for 3.5 h. Cell viability was assessed by reading absorbance at 575 nm. Each time point and surfen concentration was run in triplicate.

**Activated Partial Thromboplastin Time (APTT).** APTT was determined in duplicate with an ST4 semiautomated coagulation instrument (Diagnostics Stago). A mixture of heparin, neutralizer (protamine or surfen), and citrated plasma 1:1:8 (30  $\mu$ l) was incubated with 30  $\mu$ l of APTT reagent (Automated APTT, BioMerieux) at 37°C for 5 min followed by the addition of 30  $\mu$ l of 25 mM CaCl<sub>2</sub> to initiate clotting. Result is reported in seconds.

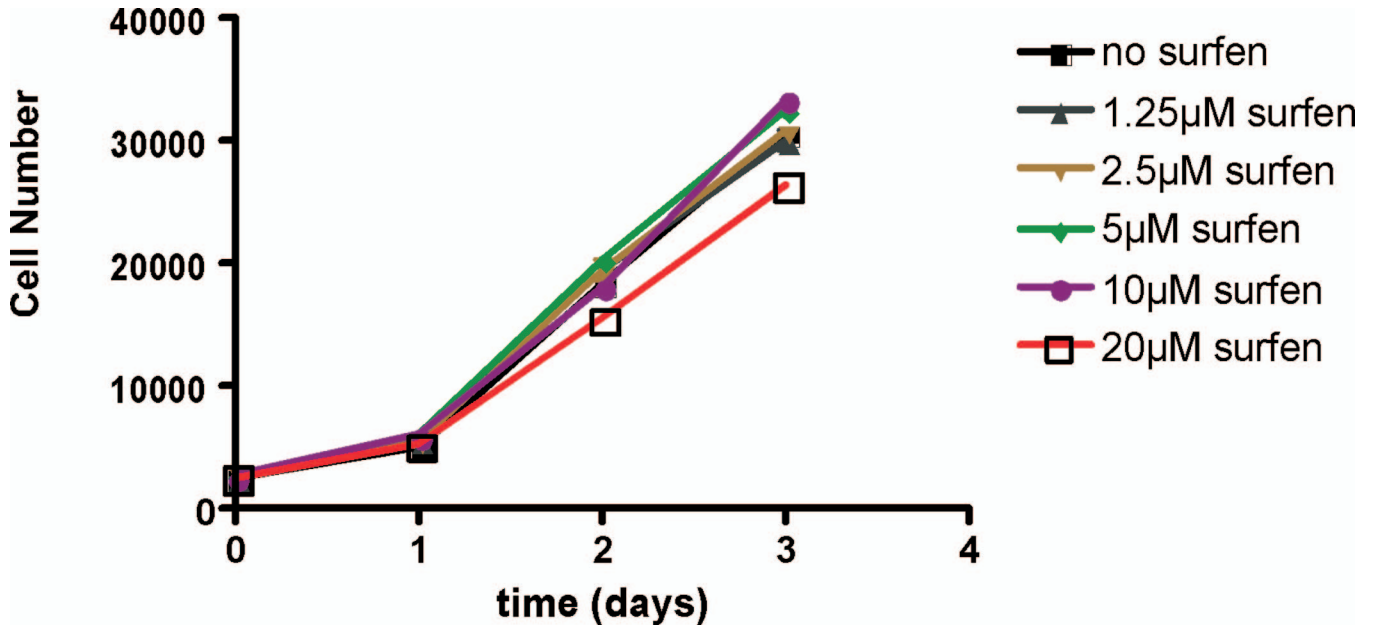

Fig. S1. Surfen has no effect on cell growth. CHO cells were seeded into 96-well plates at a density of 1,500 cells per well, and the media was changed to contain 1.25 μM to 20 μM surfen. At 1, 2, and 3 d, cell viability was assessed by Cell-Titer assay. Each time point and surfen concentration was analyzed in triplicate.

**Table S1. Surfen blocks prolongation of Activated Partial Thromboplastin Time by heparin**

| Neutralizer | Concentration | Clotting Time, s |              |            |
|-------------|---------------|------------------|--------------|------------|
|             |               | +ES heparin      | +SPL heparin | No heparin |
| Surfen      | 10 $\mu$ M    | 42               | 36           | 32         |
|             | 5 $\mu$ M     | 36               | 56           | 31         |
|             | 1 $\mu$ M     | >120             | >120         | 38         |
| Protamine   | 10 $\mu$ g    | 41               | 39           | 45         |
|             | 5 $\mu$ g     | 38               | 44           | 41         |
|             | 1 $\mu$ g     | >120             | >120         | 38         |
| None        | -             | >120             | >120         | 37         |
